# Supplementary material for: Genome-wide association study and haplotype analysis reveal novel candidate genes for resistance to powdery mildew in soybean
Source: Frontiers journal article supplement (doi:10.3389/fpls.2024.1369650), 2024-03-27
Supplement: Data_Sheet_1.zip [file Data_Sheet_1.zip]

## Sheet: Supplementary Table 1
Supplementary Table 1. The informations of 315 germplasm resources in cultivar soybean
ID	cultivars	Phenotype (2018 years)	Phenotype (2019 years)	Phenotype (2020 years)	Total phenotype	Levels of susceptible	GmRmd1c	Area
1	Jilin1	S2a	S2	S2	S2	L2	+	Jilin
2	Jilin2	R	R	R	R	L0	+	Jilin
3	Jilin3	R	R	R	R	L0	+	Jilin
4	Jilin4	R	R	R	R	L0	+	Jilin
5	Jilin5	R	R	R	R	L0	+	Jilin
6	Heilongjiang1	S3	S3	S3	S3	L3	-	Heilongjiang
7	Heilongjiang2	S1	S1	R	R	L0	+	Heilongjiang
8	Neimeng1	R	R	R	R	L0	+	Neimeng
9	Xinjiang1	NAb	R	R	R	L0	+	Xinjiang
10	Xinjiang2	R	R	R	R	L0	+	Xinjiang
11	Xinjiang3	R	R	R	R	L0	+	Xinjiang
12	Xinjiang4	R	R	R	R	L0	+	Xinjiang
13	Shanxi1	R	R	R	R	L0	+	Shanxi
14	Shanxi2	R	R	R	R	L0	+	Shanxi
15	Shanxi3	R	R	R	R	L0	+	Shanxi
16	Shanxi4	R	R	R	R	L0	+	Shanxi
17	Shanxi5	R	R	R	R	L0	+	Shanxi
18	Shanxi6	R	R	R	R	L0	+	Shanxi
19	Shanxi7	R	R	R	R	L0	+	Shanxi
20	Shanxi8	R	R	R	R	L0	+	Shanxi
21	Shanxi9	NA	R	R	R	L0	+	Shanxi
22	Shanxi10	R	R	R	R	L0	+	Shanxi
23	Beijing1	NA	S3	S3	S3	L3	+	Beijing
24	Beijing2	R	R	R	R	L0	+	Beijing
25	Beijing3	R	R	R	R	L0	+	Beijing
26	Beijing4	R	R	R	R	L0	+	Beijing
27	Beijing5	R	R	R	R	L0	+	Beijing
28	Beijing6	R	R	R	R	L0	+	Beijing
29	Beijing7	R	R	R	R	L0	+	Beijing
30	Beijing8	R	R	R	R	L0	+	Beijing
31	Beijing9	S5	S5	S5	S5	L5	-	Beijing
32	Beijing10	R	R	R	R	L0	+	Beijing
33	Beijing11	S4	S4	S4	S4	L4	-	Beijing
34	Beijing12	R	R	R	R	L0	+	Beijing
35	Hubei1	R	R	R	R	L0	+	Hubei
36	Hubei2	R	R	R	R	L0	-	Hubei
37	Hubei3	R	R	R	R	L0	+	Hubei
38	Hubei4	R	R	R	R	L0	+	Hubei
39	Hubei5	R	R	R	R	L0	+	Hubei
40	Hubei6	S4	S4	S4	S4	L4	-	Hubei
41	Hubei7	R	R	R	R	L0	+	Hubei
42	Hubei8	R	R	R	R	L0	+	Hubei
43	Hubei9	S3	S3	S3	S3	L3	-	Hubei
44	Hebei1	R	R	R	R	L0	+	Hebei
45	Hebei2	R	R	R	R	L0	+	Hebei
46	Hebei3	S3	S3	S3	S3	L3	-	Hebei
47	Hebei4	R	R	R	R	L0	+	Hebei
48	Hebei5	R	R	R	R	L0	+	Hebei
49	Hebei6	R	R	R	R	L0	+	Hebei
50	Hebei7	R	R	R	R	L0	+	Hebei
51	Hebei8	R	R	R	R	L0	+	Hebei
52	Hebei9	R	R	R	R	L0	+	Hebei
53	Hebei10	R	R	R	R	L0	+	Hebei
54	Hebei11	R	R	R	R	L0	+	Hebei
55	Hebei12	S3	NA	S3	S3	L3	-	Hebei
56	Hebei13	S1	NA	R	R	L0	-	Hebei
57	Hebei14	R	NA	R	R	L0	+	Hebei
58	Hebei15	R	R	R	R	L0	+	Hebei
59	Hebei16	R	R	R	R	L0	+	Hebei
60	Hebei17	R	R	R	R	L0	+	Hebei
61	Hebei18	NA	S1	R	R	L0	+	Hebei
62	Hebei19	NA	R	R	R	L0	+	Hebei
63	Shaanxi1	R	R	R	R	L0	+	Shaanxi
64	Shaanxi2	R	R	R	R	L0	+	Shaanxi
65	Shaanxi3	R	R	R	R	L0	+	Shaanxi
66	Shaanxi4	R	R	R	R	L0	+	Shaanxi
67	Shaanxi5	R	R	R	R	L0	+	Shaanxi
68	Shaanxi6	S5	S5	S5	S5	L5	-	Shaanxi
69	Shaanxi7	S5	S5	S5	S5	L5	-	Shaanxi
70	Shaanxi8	S5	S5	S5	S5	L5	+	Shaanxi
71	Shandong1	S5	R	S5	S5	L5	-	Shandong
72	Shandong2	R	R	R	R	L0	+	Shandong
73	Shandong3	R	R	R	R	L0	+	Shandong
74	Shandong4	S3	S3	S3	S3	L3	-	Shandong
75	Shandong5	R	R	R	R	L0	+	Shandong
76	Shandong6	R	R	R	R	L0	+	Shandong
77	Shandong7	R	R	R	R	L0	+	Shandong
78	Shandong8	R	R	R	R	L0	+	Shandong
79	Shandong9	R	R	R	R	L0	+	Shandong
80	Shandong10	R	R	R	R	L0	+	Shandong
81	Shandong11	S5	S5	S5	S5	L5	-	Shandong
82	Shandong12	S5	S5	S5	S5	L5	-	Shandong
83	Shandong13	R	R	R	R	L0	+	Shandong
84	Shandong14	S5	S5	S5	S5	L5	-	Shandong
85	Shandong15	R	R	R	R	L0	+	Shandong
86	Shandong16	R	R	R	R	L0	+	Shandong
87	Shandong17	S3	S3	S3	S3	L3	-	Shandong
88	Shandong18	R	R	R	R	L0	+	Shandong
89	Shandong19	R	R	R	R	L0	+	Shandong
90	Shandong20	R	R	R	R	L0	+	Shandong
91	Shandong21	R	R	R	R	L0	+	Shandong
92	Shandong22	R	R	R	R	L0	+	Shandong
93	Zhejiang1	R	R	R	R	L0	+	Zhejiang
94	Zhejiang2	NA	R	R	R	L0	+	Zhejiang
95	Zhejiang3	NA	R	R	R	L0	+	Zhejiang
96	Zhejiang4	R	R	R	R	L0	+	Zhejiang
97	Zhejiang5	S5	S5	S5	S5	L5	-	Zhejiang
98	Zhejiang6	R	R	R	R	L0	+	Zhejiang
99	Jiangsu1	S2	S2	S2	S2	L2	-	Jiangsu
100	Jiangsu2	S5	S5	S5	S5	L5	-	Jiangsu
101	Jiangsu3	R	S5	S5	S5	L5	-	Jiangsu
102	Jiangsu4	S2	S2	S2	S2	L2	-	Jiangsu
103	Jiangsu5	S5	S5	S5	S5	L5	-	Jiangsu
104	Jiangsu6	S2	S2	S2	S2	L2	-	Jiangsu
105	Jiangsu7	R	R	R	R	L0	+	Jiangsu
106	Jiangsu8	NA	NA	S3	S3	L3	-	Jiangsu
107	Jiangsu9	R	R	S1	R	L0	+	Jiangsu
108	Jiangsu10	R	R	R	R	L0	+	Jiangsu
109	Jiangsu11	S2	S2	S2	S2	L2	+	Jiangsu
110	Jiangsu12	R	R	R	R	L0	+	Jiangsu
111	Jiangsu13	NA	S3	S3	S3	L3	-	Jiangsu
112	Anhui1	R	R	R	R	L0	+	Anhui
113	Anhui2	S2	S2	S2	S2	L2	-	Anhui
114	Anhui3	S3	S3	S3	S3	L3	-	Anhui
115	Anhui4	R	R	R	R	L0	+	Anhui
116	Anhui5	NA	S3	S3	S3	L3	-	Anhui
117	Anhui6	R	R	R	R	L0	+	Anhui
118	Anhui7	S3	S3	S3	S3	L3	-	Anhui
119	Anhui8	R	R	R	R	L0	+	Anhui
120	Anhui9	R	R	R	R	L0	+	Anhui
121	Anhui10	R	R	R	R	L0	+	Anhui
122	Anhui11	R	R	R	R	L0	+	Anhui
123	Anhui12	S3	S3	S3	S3	L3	-	Anhui
124	Anhui13	S3	S3	S3	S3	L3	-	Anhui
125	Anhui14	NA	S3	S3	S3	L3	-	Anhui
126	Anhui15	R	R	R	R	L0	+	Anhui
127	Anhui16	R	R	S3	S3	L3	-	Anhui
128	Anhui17	S3	R	S3	S3	L3	-	Anhui
129	Anhui18	R	R	R	R	L0	+	Anhui
130	Anhui19	R	R	S1	S1	L1	-	Anhui
131	Anhui20	S4	S4	S4	S4	L4	-	Anhui
132	Anhui21	S3	S3	S3	S3	L3	-	Anhui
133	Anhui22	S3	S3	S3	S3	L3	-	Anhui
134	Anhui23	R	NA	R	R	L0	+	Anhui
135	Anhui24	R	R	R	R	L0	+	Anhui
136	Anhui25	R	R	R	R	L0	+	Anhui
137	Anhui26	R	R	R	R	L0	+	Anhui
138	Anhui27	S3	R	S3	S3	L3	-	Anhui
139	Anhui28	R	R	R	R	L0	+	Anhui
140	Anhui29	S3	S3	S3	S3	L3	-	Anhui
141	Anhui30	R	R	R	R	L0	+	Anhui
142	Anhui31	R	R	R	R	L0	+	Anhui
143	Anhui33	R	R	R	R	L0	+	Anhui
144	Anhui34	S3	S3	S3	S3	L3	-	Anhui
145	Anhui35	S5	S5	S5	S5	L5	-	Anhui
146	Anhui36	NA	R	R	R	L0	+	Anhui
147	Anhui37	S3	S3	S3	S3	L3	-	Anhui
148	Anhui38	R	R	R	R	L0	+	Anhui
149	Anhui39	NA	R	R	R	L0	+	Anhui
150	Anhui40	S3	S3	S3	S3	L3	-	Anhui
151	Anhui41	R	R	R	R	L0	+	Anhui
152	Anhui42	S3	S3	S3	S3	L3	-	Anhui
153	Anhui43	NA	NA	S3	S3	L3	-	Anhui
154	Anhui44	R	R	R	R	L0	-	Anhui
155	Fujian1	R	R	R	R	L0	+	Fujian
156	Fujian2	R	R	R	R	L0	+	Fujian
157	Fujian3	R	R	R	R	L0	+	Fujian
158	Fujian4	R	R	R	R	L0	-	Fujian
159	Fujian5	R	R	R	R	L0	+	Fujian
160	Fujian6	R	R	R	R	L0	+	Fujian
161	Fujian7	S3	S3	S3	S3	L3	-	Fujian
162	Fujian8	R	R	R	R	L0	+	Fujian
163	Hunan1	R	R	R	R	L0	+	Hunan
164	Hunan2	R	R	R	R	L0	+	Hunan
165	Hunan3	S2	S2	S2	S2	L2	-	Hunan
166	Hunan4	NA	R	R	R	L0	+	Hunan
167	Hunan5	R	R	R	R	L0	+	Hunan
168	Henan1	S3	S3	S3	S3	L3	-	Henan
169	Henan2	R	R	R	R	L0	+	Henan
170	Henan3	S4	S4	S4	S4	L4	-	Henan
171	Henan4	S2	S2	S2	S2	L2	-	Henan
172	Henan5	S2	S2	S2	S2	L2	+	Henan
173	Henan6	S3	S3	S3	S3	L3	-	Henan
174	Henan7	R	R	R	R	L0	+	Henan
175	Henan8	S2	S2	S2	S2	L2	-	Henan
176	Henan9	S4	R	S4	S4	L4	-	Henan
177	Henan10	R	R	R	R	L0	+	Henan
178	Henan11	S3	S3	S3	S3	L3	-	Henan
179	Henan12	R	R	R	R	L0	+	Henan
180	Jiangxi1	S2	S2	S2	S2	L2	-	Jiangxi
181	Jiangxi2	R	R	R	R	L0	+	Jiangxi
182	Jiangxi3	S3	S3	S3	S3	L3	+	Jiangxi
183	Jiangxi4	S2	S2	S2	S2	L2	-	Jiangxi
184	Jiangxi5	S3	S3	S3	S3	L3	-	Jiangxi
185	Jiangxi6	S3	S3	S3	S3	L3	-	Jiangxi
186	Sichuan1	S3	S3	S3	S3	L3	-	Sichuan
187	Sichuan2	S5	S5	S5	S5	L5	-	Sichuan
188	Sichuan3	R	R	R	R	L0	+	Sichuan
189	Sichuan4	R	R	R	R	L0	+	Sichuan
190	Sichuan5	R	R	R	R	L0	+	Sichuan
191	Sichuan6	R	R	R	R	L0	+	Sichuan
192	Sichuan7	R	R	R	R	L0	+	Sichuan
193	Sichuan8	R	R	R	R	L0	+	Sichuan
194	Sichuan9	R	R	R	R	L0	+	Sichuan
195	Sichuan10	R	S5	S5	S5	L5	-	Sichuan
196	Sichuan11	R	R	R	R	L0	+	Sichuan
197	Sichuan12	R	R	R	R	L0	+	Sichuan
198	Sichuan13	R	R	R	R	L0	+	Sichuan
199	Sichuan14	S3	S3	S3	S3	L3	-	Sichuan
200	Sichuan15	S2	S2	S2	S2	L2	-	Sichuan
201	Sichuan16	R	R	R	R	L0	+	Sichuan
202	Sichuan17	S2	S2	S2	S2	L2	-	Sichuan
203	Sichuan18	NA	S3	S3	S3	L3	-	Sichuan
204	Sichuan19	R	R	R	R	L0	+	Sichuan
205	Sichuan20	R	R	R	R	L0	+	Sichuan
206	Sichuan21	R	R	R	R	L0	+	Sichuan
207	Sichuan22	NA	NA	S2	S2	L2	-	Sichuan
208	Guangdong1	R	R	R	R	L0	+	Guangdong
209	Guangdong2	R	R	R	R	L0	+	Guangdong
210	Guangdong3	R	R	R	R	L0	+	Guangdong
211	Guangdong4	S3	S3	S3	S3	L3	-	Guangdong
212	Guangdong5	S3	S3	S3	S3	L3	-	Guangdong
213	Guangdong6	S5	S5	S5	S5	L5	-	Guangdong
214	Guangdong7	R	R	R	R	L0	+	Guangdong
215	Guangdong8 (HX3)	NA	NA	S5	S5	L5	-	Guangdong
216	Guangdong9	S5	S5	S5	S5	L5	-	Guangdong
217	Guangdong10	S3	S3	S3	S3	L3	-	Guangdong
218	Guangdong11	S3	S3	S3	S3	L3	-	Guangdong
219	Guangdong12	S3	S3	S3	S3	L3	-	Guangdong
220	Guangdong13	S2	S2	S2	S2	L2	-	Guangdong
221	Guangdong14	R	R	R	R	L0	+	Guangdong
222	Guangdong15	R	R	R	R	L0	+	Guangdong
223	Guangdong16	S3	S3	S3	S3	L3	-	Guangdong
224	Guangdong17	S3	S3	S3	S3	L3	-	Guangdong
225	Guangxi1	R	R	R	R	L0	+	Guangxi
226	Guangxi2	S5	S5	S5	S5	L5	-	Guangxi
227	Guangxi3	S2	S2	S2	S2	L2	-	Guangxi
228	Guangxi4	R	R	R	R	L0	+	Guangxi
229	Guangxi5	R	R	R	R	L0	+	Guangxi
230	Guangxi6	R	R	R	R	L0	+	Guangxi
231	Guangxi7	R	R	R	R	L0	+	Guangxi
232	Guangxi8	S3	R	S3	S3	L3	-	Guangxi
233	Guangxi9	R	R	R	R	L0	+	Guangxi
234	Guangxi10	R	R	R	R	L0	+	Guangxi
235	Guangxi11	R	R	R	R	L0	+	Guangxi
236	Guangxi12	S3	S3	S3	S3	L3	-	Guangxi
237	Guizhou1	R	R	R	R	L0	+	Guizhou
238	Guizhou2	R	R	R	R	L0	+	Guizhou
239	Guizhou3	R	R	R	R	L0	+	Guizhou
240	Guizhou4	R	R	R	R	L0	+	Guizhou
241	Guizhou5	R	R	R	R	L0	+	Guizhou
242	Yunnan1	R	R	R	R	L0	+	Yunnan
243	Yunnan2	R	R	R	R	L0	+	Yunnan
244	Yunnan3	R	R	R	R	L0	+	Yunnan
245	Yunnan4	R	R	R	R	L0	+	Yunnan
246	Yunnan5	R	R	R	R	L0	+	Yunnan
247	Yunnan6	S3	S3	S3	S3	L3	-	Yunnan
248	Yunnan7	R	R	R	R	L0	+	Yunnan
249	Yunnan8	R	R	R	R	L0	+	Yunnan
250	Yunnan9	R	R	R	R	L0	+	Yunnan
251	Ethiopia1	NA	R	R	R	L0	+	Ethiopia
252	Ethiopia2	R	R	R	R	L0	+	Ethiopia
253	Ethiopia3	S5	S5	S5	S5	L5	-	Ethiopia
254	Ethiopia4	S5	S5	S5	S5	L5	-	Ethiopia
255	Ethiopia5	R	R	R	R	L0	+	Ethiopia
256	Ethiopia6	R	R	R	R	L0	+	Ethiopia
257	Ethiopia7	R	R	R	R	L0	+	Ethiopia
258	Japan1	S3	S3	S3	S3	L3	-	Japan
259	Japan2	NA	NA	S1	S1	L1	+	Japan
260	Vietnam1	S2	S2	S2	S2	L2	-	Vietnam
261	Vietnam2	S4	S4	S4	S4	L4	-	Vietnam
262	Thailand1	R	R	R	R	L0	+	Thailand
263	USA1	R	R	R	R	L0	+	America
264	USA2	R	R	S4	S4	L4	-	America
265	USA3	S4	S4	S4	S4	L4	-	America
266	USA4	R	R	R	R	L0	+	America
267	USA5	S1	S1	R	R	L0	+	America
268	USA6	R	R	R	R	L0	+	America
269	USA7	S3	S3	S3	S3	L3	-	America
270	USA8	S3	S3	S3	S3	L3	-	America
271	USA9	S1	R	R	R	L0	+	America
272	USA10	S3	S3	S3	S3	L3	-	America
273	Australia1	R	R	R	R	L0	+	Australia
274	Australia2	R	R	R	R	L0	+	Australia
275	Australia3	S3	S3	S3	S3	L3	-	Australia
276	Australia4	S3	S3	S3	S3	L3	-	Australia
277	Australia5	R	R	R	R	L0	+	Australia
278	Brazil1	R	R	R	R	L0	+	Brazil
279	Brazil2	NA	NA	R	R	L0	+	Brazil
280	Brazil3	R	R	R	R	L0	+	Brazil
281	Brazil4	R	R	R	R	L0	+	Brazil
282	Brazil5	R	R	R	R	L0	+	Brazil
283	Brazil6	S4	S4	S4	S4	L4	-	Brazil
284	Brazil7	R	R	R	R	L0	+	Brazil
285	Brazil8	R	R	R	R	L0	+	Brazil
286	Brazil9	R	R	R	R	L0	+	Brazil
287	Brazil10	R	R	R	R	L0	+	Brazil
288	Brazil11	R	R	R	R	L0	+	Brazil
289	Brazil12	R	R	R	R	L0	+	Brazil
290	Brazil13	R	R	R	R	L0	+	Brazil
291	Brazil14	R	R	R	R	L0	+	Brazil
292	Brazil15	R	R	R	R	L0	+	Brazil
293	Africa1	R	R	R	R	L0	+	Africa
294	Africa2	R	R	R	R	L0	+	Africa
295	Africa3	S5	S5	S5	S5	L5	-	Africa
296	Africa4	R	R	R	R	L0	+	Africa
297	Africa5	R	R	R	R	L0	+	Africa
298	Africa6	R	R	R	R	L0	+	Africa
299	Africa7	R	R	R	R	L0	+	Africa
300	Africa8	R	R	R	R	L0	+	Africa
301	Africa9	R	R	R	R	L0	+	Africa
302	Africa10	R	R	R	R	L0	+	Africa
303	Canada1	S3	S3	S3	S3	L3	-	Canada
304	Canada2	S5	S5	S5	S5	L5	-	Canada
305	VX93	NA	R	R	R	L0	+	Unknown
306	Dian cha Dou	R	R	R	R	L0	+	Unknown
307	NOVA	R	R	R	R	L0	+	Unknown
308	Heidouzi	R	R	R	R	L0	+	Unknown
309	ZDD16505	R	S5	S5	S5	L5	-	Unknown
310	ZDD16487-2	R	R	R	R	L0	+	Unknown
311	ZDD16642	S2	S2	S2	S2	L2	-	Unknown
312	ZDD16513	R	R	R	R	L0	+	Unknown
313	Jiugedou	S5	S5	S5	S5	L5	-	Unknown
314	Shiyuexiaohuangdou	R	R	R	R	L0	+	Unknown
315	Guanzhuanghuangdou	S3	S3	S3	S3	L3	+	Unknown
a S1, S2, S3, S4 and S5: The levels of susceptibility were 1-5 to PMD.
b NA means no data.
c "+" indicates that GmRmd1 is complete, and "-" indicates that GmRmd1 is missing.

## Sheet: Supplementary Table 2
Supplementary Table 2. The datasets of re-sequencing in 315 accessions.
ID	Sequencing ID	Raw Reads	Sequencing Depth	Clean Reads	Rate of clean reads	Mapped Reads	Mapping Rate (properly paired)
1	SCG45	47283629	14	46621842	0.986	42314127	0.9076
2	SCG52	39014081	12	38454373	0.9857	34587766	0.8994
3	SCG285	42724762	13	42373699	0.9918	38881159	0.9176
4	SCG284	48339042	15	47838959	0.9897	43959500	0.9189
5	SCG282	41718110	13	40794481	0.9779	37298132	0.9143
6	SCG283	53143623	16	52672410	0.9911	47838571	0.9082
7	SCG293	38267926	12	37535399	0.9809	34526477	0.9198
8	SCG281	44877110	14	44412514	0.9896	40701751	0.9164
9	SCG280	38069881	12	37386144	0.982	34517353	0.9233
10	SCG279	44275345	14	43077685	0.9729	39667001	0.9208
11	SCG278	42952024	13	42579852	0.9913	38871196	0.9129
12	SCG277	45002034	14	44580242	0.9906	40953879	0.9187
13	S140_643	54160066	17	52348323	0.9665	50586325	0.9663
14	SCG276	51892596	16	51278117	0.9882	46368904	0.9043
15	SCG275	48187888	15	47727939	0.9905	43874484	0.9193
16	SCG274	50443384	15	49157464	0.9745	44664321	0.9086
17	SCG273	47547530	15	46607414	0.9802	42964040	0.9218
18	SCG272	41463404	13	41088772	0.991	37226760	0.906
19	SCG271	38782673	12	37905184	0.9774	34888226	0.9204
20	SCG34	41075928	13	40676180	0.9903	37174543	0.9139
21	S140_615	62121936	19	61133018	0.9841	59090900	0.9666
22	SCG270	52914646	16	52471041	0.9916	48763842	0.9293
23	SCG269	49881097	15	48740854	0.9771	44846878	0.9201
24	SCG268	45727273	14	44798889	0.9797	41165823	0.9189
25	S140_614	46065306	14	45301389	0.9834	44008386	0.9715
26	SCG267	37160116	11	36817659	0.9908	33819636	0.9186
27	SCG266	47765473	15	47341017	0.9911	43469447	0.9182
28	SCG265	51678667	16	50315192	0.9736	46667109	0.9275
29	S140_647	59494496	18	57861863	0.9726	56210812	0.9715
30	S140_638	57021512	17	55867387	0.9798	53834478	0.9636
31	SCG264	51558835	16	51005646	0.9893	46727489	0.9161
32	SCG263	60990480	19	60326650	0.9891	55719842	0.9236
33	SCG46	51753592	16	51252301	0.9903	47318446	0.9232
34	SCG262	41748273	13	40790082	0.977	37457093	0.9183
35	SCG261	51418366	16	50862674	0.9892	46889175	0.9219
36	SCG260	58634941	18	56961252	0.9715	52481226	0.9213
37	SCG259	51516760	16	50224890	0.9749	45738788	0.9107
38	SCG258	53732418	16	52654038	0.9799	47468650	0.9015
39	SCG257	44880503	14	44044295	0.9814	40234780	0.9135
40	SCG256	43367151	13	42597825	0.9823	38693072	0.9083
41	SCG255	45732239	14	45271915	0.9899	41612608	0.9192
42	SCG254	46596496	14	45684244	0.9804	41512599	0.9087
43	S140_641	56226543	17	54846947	0.9755	52716709	0.9612
44	SCG253	42952782	13	42030266	0.9785	38767911	0.9224
45	SCG67	39532469	12	38892839	0.9838	35735126	0.9188
46	SCG252	40524067	12	40186480	0.9917	36819026	0.9162
47	SCG161	52134107	16	49619720	0.9518	46140949	0.9299
48	SCG251	70848730	22	70488481	0.9949	67134090	0.9524
49	SCG250	39794127	12	38722869	0.9731	36440035	0.941
50	SCG249	50334133	15	49842533	0.9902	45410355	0.9111
51	SCG248	45338694	14	44827188	0.9887	40046366	0.8933
52	SCG247	66842542	20	66374103	0.993	61217979	0.9223
53	SCG246	56942634	17	56364657	0.9898	51022769	0.9052
54	SCG245	45880114	14	45444584	0.9905	41963202	0.9234
55	S140_635	44906358	14	43857089	0.9766	42041285	0.9586
56	SCG244	38354058	12	37347017	0.9737	34412327	0.9214
57	SCG243	39242835	12	38313651	0.9763	34927439	0.9116
58	SCG242	42335725	13	41931912	0.9905	38300071	0.9134
59	SCG241	68336978	21	67403158	0.9863	60886463	0.9033
60	SCG240	45119776	14	44060475	0.9765	40147556	0.9112
61	SCG239	40934238	13	40042346	0.9782	36813354	0.9194
62	SCG238	39644762	12	39237105	0.9897	35945567	0.9161
63	SCG237	49351463	15	48624681	0.9853	44008941	0.9051
64	SCG236	41137113	13	39952797	0.9712	36557874	0.915
65	SCG235	36744610	11	35925551	0.9777	33050184	0.92
66	SCG234	59537250	18	58784176	0.9874	53654034	0.9127
67	SCG233	42635859	13	42200006	0.9898	38549897	0.9135
68	SCG232	41975606	13	41344325	0.985	38292067	0.9262
69	SCG231	63190748	19	62678985	0.9919	57488258	0.9172
70	SCG230	66186479	20	65734861	0.9932	60818249	0.9252
71	SCG229	50528544	15	49702760	0.9837	45603451	0.9175
72	SCG228	63748418	20	63165583	0.9909	57821991	0.9154
73	SCG227	46513481	14	45846207	0.9857	41614569	0.9077
74	SCG225	52573283	16	52072989	0.9905	47814330	0.9182
75	SCG226	53379738	16	52747534	0.9882	47859935	0.9073
76	SCG304	57606678	18	55136248	0.9571	51915672	0.9416
77	SCG224	49618124	15	48948344	0.9865	44395891	0.907
78	SCG223	52701557	16	51960586	0.9859	47992222	0.9236
79	SCG222	55929298	17	55459251	0.9916	51723589	0.9326
80	SCG221	61145017	19	60284721	0.9859	55386995	0.9188
81	SCG220	47858020	15	46645719	0.9747	43107003	0.9241
82	SCG219	44042335	13	43372007	0.9848	39834205	0.9184
83	SCG305	56691081	17	55744782	0.9833	53241074	0.9551
84	SCG218	50407989	15	50066112	0.9932	46925858	0.9373
85	SCG217	49313020	15	48896588	0.9916	45572742	0.932
86	SCG306	39642673	12	38267498	0.9653	36473622	0.9531
87	SCG215	47297774	14	46796891	0.9894	42606380	0.9105
88	SCG307	38213777	12	37061069	0.9698	35205751	0.9499
89	SCG214	41164311	13	40075158	0.9735	37125823	0.9264
90	SCG213	44923266	14	43793637	0.9749	40423118	0.923
91	SCG212	48901649	15	47699624	0.9754	44282013	0.9284
92	SCG211	55511278	17	54224923	0.9768	50424645	0.9299
93	S140_613	48988181	15	48186119	0.9836	46014523	0.9549
94	SCG310	51036880	16	49182330	0.9637	46275428	0.9409
95	SCG311	40634346	12	39398638	0.9696	37067882	0.9408
96	SCG210	44957627	14	44457512	0.9889	40187998	0.904
97	SCG209	39384925	12	38153656	0.9687	34424150	0.9023
98	SCG207	49063696	15	48446588	0.9874	44659867	0.9218
99	SCG208	53263002	16	52575808	0.9871	48231304	0.9174
100	SCG206	57702650	18	57306752	0.9931	52173397	0.9104
101	SCG312	47004836	14	46383330	0.9868	44033786	0.9493
102	SCG313	47911140	15	47161307	0.9843	4.36727e+07	0.926
103	SCG314	41817719	13	41211851	0.9855	38708247	0.9393
104	SCG315	52396384	16	50502589	0.9639	47916347	0.9488
105	SCG205	36740132	11	35532592	0.9671	32539891	0.9158
106	SCG204	39673888	12	39008750	0.9832	35873461	0.9196
107	SCG203	39801261	12	38241892	0.9608	34965260	0.9143
108	SCG202	40785984	12	39445673	0.9671	35902518	0.9102
109	S140_620	46004272	14	45187519	0.9822	43727197	0.9677
110	SCG201	41422298	13	40182121	0.9701	36522598	0.9089
111	SCG200	52888564	16	51467395	0.9731	47493641	0.9228
112	SCG199	68548684	21	68042585	0.9926	61705906	0.9069
113	SCG198	40372721	12	39299379	0.9734	35645108	0.907
114	SCG197	48401479	15	47128840	0.9737	43766507	0.9287
115	SCG196	52658066	16	51327618	0.9747	47351861	0.9225
116	SCG195	44948348	14	43815719	0.9748	40403474	0.9221
117	SCG194	52731265	16	52319059	0.9922	48064205	0.9187
118	SCG193	59278100	18	58565073	0.988	52768117	0.901
119	SCG192	60653367	19	58925597	0.9715	54121335	0.9185
120	SCG191	61600275	19	59572377	0.9671	54521804	0.9152
121	SCG190	65637328	20	64900911	0.9888	59511139	0.917
122	SCG189	36484043	11	35636281	0.9768	32741615	0.9188
123	SCG188	57683459	18	55839902	0.968	50523765	0.9048
124	SCG187	60028716	18	58469168	0.974	53257568	0.9109
125	SCG186	54391363	17	53155300	0.9773	48559934	0.9135
126	SCG316	52597411	16	51798509	0.9848	48760367	0.9413
127	SCG317	46475797	14	45692211	0.9831	43207093	0.9456
128	SCG49	52250007	16	51510111	0.9858	47190016	0.9161
129	SCG185	47260268	14	45863657	0.9704	41800611	0.9114
130	SCG184	57013455	17	55030423	0.9652	49622220	0.9017
131	SCG318	51593487	16	49783450	0.9649	46769009	0.9394
132	SCG183	45295583	14	43461753	0.9595	39879992	0.9176
133	SCG182	52981464	16	51619476	0.9743	46768903	0.906
134	SCG181	61076398	19	60638845	0.9928	55510381	0.9154
135	SCG180	51158338	16	48155611	0.9413	44296375	0.9199
136	SCG179	80363323	25	79652611	0.9912	72479908	0.91
137	SCG178	43833354	13	41020505	0.9358	37325880	0.9099
138	SCG177	65156469	20	64603142	0.9915	58314336	0.9027
139	SCG176	54134210	17	51414871	0.9498	47435967	0.9226
140	SCG175	42368908	13	40062680	0.9456	36579925	0.9131
141	SCG174	45040936	14	42354828	0.9404	38697815	0.9137
142	SCG173	47281936	14	45146405	0.9548	41712867	0.9239
143	SCG172	38114029	12	36919169	0.9687	33532574	0.9083
144	SCG171	52973450	16	51472884	0.9717	46826004	0.9097
145	SCG170	36821346	11	35793017	0.9721	32695351	0.9135
146	SCG169	36744009	11	35759236	0.9732	32392253	0.9058
147	SCG168	41053399	13	39062111	0.9515	35659017	0.9129
148	SCG6	70593525	22	69712506	0.9875	63643517	0.9129
149	SCG167	88946244	27	88207185	0.9917	80947356	0.9177
150	SCG319	55213521	17	53436942	0.9678	50290659	0.9411
151	SCG320	49464494	15	48681807	0.9842	46287032	0.9508
152	SCG68	42490283	13	41891693	0.9859	37997460	0.907
153	S140_619	50907319	16	49928950	0.9808	48119858	0.9638
154	S140_618	47120779	14	46190616	0.9803	44637118	0.9664
155	SCG166	47449203	15	44669890	0.9414	41150200	0.9212
156	SCG165	39924017	12	38071614	0.9536	34852059	0.9154
157	SCG164	40580152	12	38595224	0.9511	35077949	0.9089
158	SCG292	41165670	13	40281971	0.9785	36946033	0.9172
159	SCG294	52818582	16	52357943	0.9913	48244331	0.9214
160	SCG295	54126442	17	52081935	0.9622	47476323	0.9116
161	SCG296	53304687	16	51646360	0.9689	47302132	0.9159
162	SCG297	45485270	14	43636435	0.9594	39766446	0.9113
163	SCG163	47185440	14	45160650	0.9571	41774727	0.925
164	SCG162	50156055	15	49552326	0.988	45362304	0.9154
165	SCG144	46291384	14	45906156	0.9917	41712448	0.9086
166	SCG298	44616856	14	42752739	0.9582	38994345	0.9121
167	SCG299	41990585	13	40783204	0.9712	37896403	0.9292
168	SCG160	52757947	16	49470639	0.9377	45143652	0.9125
169	SCG159	40302146	12	39965339	0.9916	37155439	0.9297
170	SCG158	58901716	18	58518558	0.9935	54147168	0.9253
171	SCG157	47546681	15	45179096	0.9502	41376591	0.9158
172	sSCG156	45553754	14	44995710	0.9877	42531611	0.9452
173	s153	37404528	11	36908991	0.9868	34686839	0.9398
174	SCG152	45355157	14	42928550	0.9465	38824657	0.9044
175	SCG151	55743265	17	55330273	0.9926	51105588	0.9236
176	SCG150	89684626	27	89019826	0.9926	82905333	0.9313
177	SCG149	50958414	16	48020445	0.9423	43835531	0.9129
178	SCG148	43995589	13	41988775	0.9544	38111628	0.9077
179	SCG147	53069948	16	50848955	0.9581	46422966	0.913
180	SCG143	37639827	12	36396793	0.967	33360532	0.9166
181	S140_623	51678030	16	50582821	0.9788	48551444	0.9598
182	SCG142	39556862	12	38583996	0.9754	35241194	0.9134
183	SCG141	43364026	13	42412975	0.9781	39026896	0.9202
184	S140_634	49560998	15	48318224	0.9749	46420702	0.9607
185	SCG140	42536684	13	40920921	0.962	37823399	0.9243
186	SCG139	48538665	15	46420804	0.9564	42964019	0.9255
187	SCG138	46225280	14	45673776	0.9881	41669687	0.9123
188	SCG137	64490921	20	61254043	0.9498	55967800	0.9137
189	SCG136	47122819	14	46641161	0.9898	42862620	0.919
190	SCG15	47668258	15	47133886	0.9888	42645960	0.9048
191	S140_617	50334078	15	49305872	0.9796	47632066	0.9661
192	S140_629	50844931	16	49852087	0.9805	47709742	0.957
193	S140_633	56501119	17	55134170	0.9758	53036604	0.962
194	SCG135	48734108	15	46963627	0.9637	43380898	0.9237
195	S140_624	50814294	16	49334682	0.9709	47072043	0.9541
196	SCG59	44790702	14	44208587	0.987	41036488	0.9282
197	SCG115	56868372	17	52836349	0.9291	48199649	0.9122
198	SCG51	42222788	13	41648659	0.9864	37883834	0.9096
199	SCG113	36892549	11	36385836	0.9863	33512038	0.921
200	SCG112	39283103	12	38784524	0.9873	35425847	0.9134
201	SCG111	44615662	14	43438719	0.9736	40514058	0.9327
202	S140_642	48311745	15	46475016	0.962	44980952	0.9679
203	SCG109	58328406	18	57814761	0.9912	53808336	0.9307
204	SCG108	61428953	19	60816175	0.99	55326827	0.9097
205	SCG107	66633235	20	65974359	0.9901	60862238	0.9225
206	SCG106	40563131	12	40238272	0.992	36801662	0.9146
207	SCG105	47629218	15	47244384	0.9919	43232241	0.9151
208	SCG134	39222475	12	37490072	0.9558	34564208	0.922
209	SCG58	46679766	14	46118775	0.988	41988504	0.9104
210	SCG132	40718008	12	38290396	0.9404	34449633	0.8997
211	SCG62	44125550	14	43453237	0.9848	39360452	0.9058
212	SCG63	47936035	15	47269783	0.9861	42895239	0.9075
213	S140_626	47950670	15	47113591	0.9825	45398960	0.9636
214	SCG131	51244083	16	50442021	0.9843	45950280	0.911
215	SCG130	68531268	21	68038856	0.9928	63343126	0.931
216	S140_637	47576883	15	46305300	0.9733	44512182	0.9613
217	SCG60	52690537	16	52118524	0.9891	47106945	0.9038
218	S140_627	49389212	15	48163793	0.9752	46123663	0.9576
219	SCG129	48395987	15	46764212	0.9663	43084353	0.9213
220	S140_636	42457671	13	41443148	0.9761	40071722	0.9669
221	SCG128	40825159	13	39590668	0.9698	36394275	0.9193
222	SCG47	47327277	15	46685495	0.9864	42380903	0.9078
223	SCG95	43474929	13	43085585	0.991	40601264	0.9423
224	SCG94	45955095	14	45367071	0.9872	43145915	0.951
225	S140_625	51254192	16	50071839	0.9769	47072433	0.9401
226	SCG133	55046329	17	52477064	0.9533	47771185	0.9103
227	SCG127	55463270	17	52966926	0.955	49303455	0.9308
228	SCG126	42341668	13	41132487	0.9714	37369785	0.9085
229	SCG125	40344973	12	37596590	0.9319	34300085	0.9123
230	SCG124	40898649	13	38208574	0.9342	34731020	0.909
231	SCG123	41114795	13	38476011	0.9358	34545939	0.8979
232	S140_632	46401072	14	45336711	0.9771	43815384	0.9664
233	S140_631	54802246	17	53956343	0.9846	51985914	0.9635
234	SCG121	46787616	14	43142959	0.9221	38961933	0.9031
235	SCG120	44830145	14	42391138	0.9456	38762124	0.9144
236	SCG114	52046920	16	50029309	0.9612	46138245	0.9222
237	SCG119	40199609	12	38902729	0.9677	36032278	0.9262
238	SCG118	45536362	14	43880316	0.9636	40087471	0.9136
239	SCG117	55007898	17	51228220	0.9313	46686775	0.9113
240	S140_639	36913621	11	36349548	0.9847	35117219	0.9661
241	SCG116	69037281	21	68556915	0.993	64034111	0.934
242	SCG216	41066333	13	40540702	0.9872	37518209	0.9254
243	s104	40541970	12	39940112	0.9852	37245903	0.9325
244	SCG103	41090080	13	40698251	0.9905	36973747	0.9085
245	SCG102	41882947	13	41328820	0.9868	38162405	0.9234
246	SCG44	51487141	16	50687815	0.9845	46385097	0.9151
247	SCG300	47524595	15	45446904	0.9563	41835278	0.9205
248	SCG301	38726306	12	38304846	0.9891	34448183	0.8993
249	SCG303	49308244	15	47228971	0.9578	43266768	0.9161
250	SCG323	50316416	15	49521805	0.9842	46933350	0.9477
251	SCG91	57591899	18	57030301	0.9902	54127735	0.9491
252	SCG64	47897755	15	47299141	0.9875	43067645	0.9105
253	S140_612	47608489	15	46828611	0.9836	45384594	0.9692
254	SCG90	46344051	14	45854432	0.9894	43381402	0.9461
255	SCG286	53388197	16	52129678	0.9764	47843114	0.9178
256	SCG287	50908295	16	50432380	0.9907	45928309	0.9107
257	SCG288	49564353	15	48352513	0.9756	44280221	0.9158
258	S140_645	47481428	15	46154851	0.9721	44603667	0.9664
259	S140_646	42237312	13	41112635	0.9734	38931848	0.947
260	S140_622	51861703	16	50492652	0.9736	48344640	0.9575
261	SCG48	53328613	16	52446382	0.9835	47325890	0.9024
262	s89	37482707	11	36998664	0.9871	35099204	0.9487
263	SCG309	46482445	14	45763871	0.9845	43440138	0.9492
264	SCG322	48693864	15	47904237	0.9838	45444168	0.9486
265	SCG88	43852586	13	43475919	0.9914	41593155	0.9567
266	SCG87	52850265	16	52369068	0.9909	50150589	0.9576
267	SCG86	42472693	13	41988984	0.9886	39436470	0.9392
268	SCG85	42516935	13	42049763	0.989	40036570	0.9521
269	SCG84	39311331	12	38984357	0.9917	37091157	0.9514
270	SCG83	55161090	17	54638929	0.9905	51697380	0.9462
271	s82	39220366	12	38721436	0.9873	36888368	0.9527
272	SCG81	50098892	15	49562347	0.9893	47219900	0.9527
273	SCG10	41791691	13	41296891	0.9882	37314216	0.9036
274	S140_616	49093458	15	48360074	0.9851	46889762	0.9696
275	SCG80	39806758	12	39404898	0.9899	37241681	0.9451
276	SCG79	42352166	13	41973850	0.9911	39744872	0.9469
277	SCG54	49328105	15	48779978	0.9889	45115095	0.9249
278	SCG69	37330980	11	36544997	0.9789	34081420	0.9326
279	SCG78	48476322	15	48059590	0.9914	45469416	0.9461
280	S140_621	59699825	18	57956667	0.9708	55352748	0.9551
281	SCG50	53098194	16	52316901	0.9853	48117892	0.9197
282	S140_644	47221934	14	46004671	0.9742	44746752	0.9727
283	SCG65	39956484	12	39256584	0.9825	35418629	0.9022
284	SCG66	45148902	14	44416659	0.9838	40735629	0.9171
285	s77	41501604	13	40985623	0.9876	38885944	0.9488
286	S140_628	42880631	13	42295073	0.9863	40804723	0.9648
287	SCG56	38480274	12	37916891	0.9854	34400964	0.9073
288	SCG76	39872934	12	39494993	0.9905	37454654	0.9483
289	SCG57	46717262	14	46068677	0.9861	41441086	0.8996
290	SCG75	65380453	20	64838188	0.9917	61256328	0.9448
291	SCG74	44724320	14	44289635	0.9903	41868267	0.9453
292	SCG73	41818535	13	41488307	0.9921	39130935	0.9432
293	SCG61	58896406	18	58112154	0.9867	52397479	0.9017
294	SCG72	44672868	14	44319088	0.9921	42022433	0.9482
295	SCG55	39132602	12	38624415	0.987	34893942	0.9034
296	S140_610	52775603	16	51667633	0.979	49158551	0.9514
297	S140_611	52301502	16	51828130	0.9909	50467956	0.9738
298	S140_640	38239877	12	37409212	0.9783	35920612	0.9602
299	s71	46199524	14	45637303	0.9878	43272711	0.9482
300	S140_630	53433378	16	52575530	0.9839	50514620	0.9608
301	SCG70	56524432	17	55969043	0.9902	53073422	0.9483
302	S140_609	52023590	16	51024659	0.9808	49380638	0.9678
303	SCG289	68484711	21	67905943	0.9915	61559861	0.9065
304	SCG290	53184626	16	51422878	0.9669	46673007	0.9076
305	SCG302	45264714	14	43491432	0.9608	39823829	0.9157
306	SCG308	45052483	14	44418174	0.9859	42589797	0.9588
307	SCG53	47250268	14	46561691	0.9854	42494607	0.9127
308	SCG101	39396497	12	39031082	0.9907	35911283	0.9201
309	SCG100	40046311	12	39659549	0.9903	35819871	0.9032
310	SCG99	84704307	26	83972180	0.9914	79606759	0.948
311	SCG98	45471565	14	44897005	0.9874	42043236	0.9364
312	s97	46859879	14	46309559	0.9883	43457758	0.9384
313	SCG96	45791160	14	45272392	0.9887	43006524	0.95
314	s93	41249658	13	40805170	0.9892	38458913	0.9425
315	SCG92	45412985	14	45025600	0.9915	42687484	0.9481

## Sheet: Supplementary Table 3
Supplementary Table 3. Candidate genes obtained by GWAS
No.	Gene IDa	Orthologb	Annotation family
1	Glyma.16g213700	AT5G36930.2	disease resistance protein (TIR-NBS-LRR class), putative
2	Glyma.16G213800	AT5G36930.2	disease resistance protein (TIR-NBS-LRR class), putative
3	Glyma.16G213900	AT5G36930.2	disease resistance protein (TIR-NBS-LRR class), putative
4	Glyma.16G214000	AT5G45200.1	disease resistance protein (TIR-NBS-LRR class), putative
5	Glyma.16G214100	AT5G36930.2	disease resistance protein (TIR-NBS-LRR class), putative
6	Glyma.16g214200	AT5G17680.1	disease resistance protein (TIR-NBS-LRR class), putative
7	Glyma.16g214300	AT5G17680.1	disease resistance protein (TIR-NBS-LRR class), putative
8	Glyma.16g214500	AT5G36930.2	disease resistance protein (TIR-NBS-LRR class) family
9	Glyma.16g214529	AT5G18350.1	LEUCINE-RICH REPEAT-CONTAINING PROTEIN
10	Glyma.16g214557	AT5G46470.1	Encodes RPS6, a member of the TIR-NBS-LRR class resistance protein. The mRNA is cell-to-cell mobile.
11	Glyma.16g214585	AT5G17680.1	disease resistance protein (TIR-NBS-LRR class), putative
12	Glyma.16g214613	AT4G26500.1	BolA protein (bolA)
13	Glyma.16g214641	NA	Nucleoplasmin core domain
14	Glyma.16g214669	AT5G17680.1	disease resistance protein (TIR-NBS-LRR class), putative
15	Glyma.16g214700	AT1G72930.1	Toll/interleukin-1 receptor-like protein (TIR) protein
16	Glyma.16g214800	AT5G36930.2	disease resistance protein (TIR-NBS-LRR class) family
17	Glyma.16g214900	AT5G17680.1	disease resistance protein (TIR-NBS-LRR class), putative
18	Glyma.16g215000	AT5G17680.1	disease resistance protein (TIR-NBS-LRR class), putative
19	Glyma.16g215100	AT5G17680.1	disease resistance protein (TIR-NBS-LRR class), putative
20	Glyma.16g215300	AT1G27170.2	LEUCINE-RICH REPEAT-CONTAINING PROTEIN
21	Glyma.16g215400	AT5G17680.1	disease resistance protein (TIR-NBS-LRR class), putative
a Gene ID from the soybean reference genome Williams 82.a4.v1 (http://www.soybase.org).
b The accession number of Arabidopsis orthologs were obtained from the Arabidopsis Information Resource (TAIR 10,http://www.arabidopsis.org/).
c NA means no data.

## Sheet: Supplementary Table 4
Supplementary Table 4. Haploid analysis of GmRmd1 special material in different candidate genes
cultivars	phenotype	Glyma.16G213700	Glyma.16G213800	Glyma.16G213900	Glyma.16G214000	Glyma.16G214100	Glyma.16G214200	Glyma.16G214300	Glyma.16G214500	Glyma.16G214529	Glyma.16G214557	Glyma.16G214585	Glyma.16G214613	Glyma.16G214641	Glyma.16G214669	Glyma.16G214700	Glyma.16G214800	Glyma.16G214900	Glyma.16G215000	Glyma.16G215100	Glyma.16G215300	Glyma.16G215400
Jilin1	S	H3	H11	H3	H6	H8	D18	H7	H2	D7	D4	D1	H11	H3	H13	H2	H12	D2	H23	D1	H8	H7
Henan5	S	H3	H3	H7	H11	H9	D18	H7	H2	D7	D1	D1	H11	H50	H13	H2	H15	D1	H15	D1	H9	H8
Japan2	S	D1	D1	D3	D1	D3	H10	H12	H4	H19	D2	D1	D3	D2	D1	H4	H12	H4	H17	H12	H10	H15
Beijing1	S	D1	D2	H1	H15	H5	D25	H13	H1	D7	D1	D3	D3	D1	D3	D3	D7	D1	D2	H8	H7	H28
Jiangsu11	S	H3	H7	H2	H11	H8	D11	H15	H2	D7	D2	D1	D1	H32	H3	H2	H8	D1	H17	D1	H9	H7
Guanzhuanghuangdou	S	D3	H18	H2	H18	H6	D22	H25	H11	H7	H2	H1	H40	H51	H47	H1	H13	D6	H1	H18	H21	H31
Jiangxi3	S	D2	H19	H5	H16	H4	H9	H26	H2	H8	H9	H41	D1	H22	H49	D2	H4	D1	H2	H3	H8	H6
Shanxi8	S	D1	D1	D4	D2	D1	H6	H24	D1	D7	H1	H22	H37	H35	H25	H5	H12	D2	H4	H8	H10	H15
Anhui44	R	D1	H20	D7	H13	H16	D17	D1	H1	H4	H1	H29	D1	H39	H40	H5	H4	D1	H1	H17	H2	H8
Hebei13	R	D1	D4	H1	H17	D5	D14	D3	H2	D7	D2	D1	H8	H27	H28	H2	H14	D1	H2	H6	H7	H24
Fujian4	R	D1	D1	H9	H13	H18	D21	D3	H2	D7	H1	H36	H10	H15	H36	H9	H12	H7	H1	H11	H19	H20

## Sheet: Supplementary Table 5
Supplementary Table 5. Exceptional quality haplotype analysis of candidate genes
GeneID	R	R/S	S
Glyma.16G213700	H1、H2、D4、D5	H3、D1、D2	D3
Glyma.16G213800	H2、H4、H5、H6、H8、H9、D3、D4	H1、H3、H7、H10、H11、H14、H20、D1、D2	H12、H13、H15、H16、H17、H18、H19
Glyma.16G213900	D5、D6	H1、H2、H3、H4、H5、H6、H7、H9、D1、D2、D3、D4、D7	H8、H10、H11、H12、D8
Glyma.16G214000	H1、H2、H3、H4、H5、H7、H9、H10、H17	H6、H11、H12、H13、D1、D2	H8、H14、H15、H16、H18、H19
Glyma.16G214100	H1、H2、H19、H20、D2、D4、D5、D6	H8、H9、H16、H18、D1、D3	H3、H4、H5、H6、H7、H10、H11、H12、H13、H14、H15、H17、H21
Glyma.16G214200	H1、H2、H3、H4、H5、H7、H8、H10、H12、H13、D1、D2、D3、D4、D5、D6、D7、D8、D9、D10、D23	H6、H11、D11、D14、D17、D21	H9、D12、D13、D15、D16、D18、D19、D20、D22、D24、D25
Glyma.16G214300	H1、H2、H3、H4、H5、H6、H8、H9、H10、H11、H13、H16、H17、H18、H19、H20、H21、H22、H23、H27、H28、H29、H30、H31、H32、H33、H34、H35、H36	H7、H24、D1、D3	H12、H14、H15、H25、H26、D2、D4
Glyma.16G214500	H5、D2	H1、H2、H4、D1	H3、H6、H7、H8、H9、H10、H11、H12、D3
Glyma.16G214529	H2、H3、H4、H5、H16、H17、H18、D1、D2、D3、D5、D6	H1、H6、H7、D7、D8	H8、H9、H10、H11、H12、H13、H14、H15、H19、H20、D4
Glyma.16G214557	D3、D5、D6、D7、D8、D9、D10	H1、H2、H3、H6、H10、H11、D1、D2、D4	H4、H5、H7、H8、H9
Glyma.16G214585	H2、H3、H6、H23、H24、H25、H26、H27、H28、H29、H30、H31、H32、H33、H34、H35、H36、D2	H1、H4、H22、D1	H5、H7、H8、H9、H10、H11、H12、H13、H14、H15、H16、H17、H18、H19、H20、H21、H37、H38、H39、H40、H41、H42、H43、H44、D3、D4、D5
Glyma.16G214613	H1、H2、H3、H4、H5、H6、H7、H8、H15、H16、H17、H18、H19、H20、H21、H22、H23、H24、H25、H30、H31、H32、H33、H34、H35、H36、D4、D5	H10、H11、H14、D1、D3	H9、H12、H13、H26、H27、H28、H29、H37、H38、H39、H40
Glyma.16G214641	H7、H16、H17、H34、H37、H40、H41、H42、H45、H48、H49、D3	H1、H2、H3、H4、H5、H6、H8、H9、H11、H12、H13、H14、H15、H18、H19、H20、H21、H22、H23、H24、H25、H26、H27、H28、H30、H35、H36、H39、D2	H10、H29、H31、H32、H33、H38、H43、H44、H46、H47、H50、H51、D1
Glyma.16G214669	H1、H2、H4、H5、H6、H7、H8、H9、H10、H11、H12、H14、H15、H16、H17、H18、H19、H20、H21、H22、H23、H24、H26、H27、H28、H48、D2	H3、H13、H25、H36、H40、D1	H29、H30、H31、H32、H33、H34、H35、H37、H38、H39、H41、H42、H43、H44、H45、H46、H49、D3
Glyma.16G214700	/	H1、H2、H3、H4、H5、H9、D1	H6、H7、H8、D2、D3
Glyma.16G214800	H1、H2、H6、H7、H11、H14、D8	H3、H4、H8、H10、H12、H16、D1、D2、D4	H5、H13、H15、D3、D5、D6、D7
Glyma.16G214900	H1、H2、D4、H8、D8	H3、H4、H7、D1、D2、D5	H5、H6、D3、D6、D7
Glyma.16G215000	H3、H5、H6、H7、H16、H18、H19、H21、H22、H24、H25	H1、H2、H4、H8、H9、H10、H11、H15、H17、H20、H23、D1、D2	H12、H13、H14
Glyma.16G215100	H1、H4、H5、H6、H9、H15、H17、D2	H2、H3、H7、H8、H11、D1	H10、H12、H13、H16、H18、H19
Glyma.16G215300	H1、H2、H3、H4、H5、H6	H7、H9、H10、H19	H8、H11、H12、H13、H14、H15、H16、H17、H18、H20、H21
Glyma.16G215400	H1、H2、H3、H4、H5、H9、H10、H11、H12、H20、H21、H22、H23、H24、H25、H26、H33、H34	H6、H7、H8、H13、H14、H15、H16、H17	H18、H19、H27、H28、H29、H30、H31、H32、H35、D1

## Sheet: Supplementary Table 6
Supplementary Table 6. Primer sequences used for expression profiling
No.	Gene name	Forward primer (5′–3′)	Reverse primer (5′–3′)	Annealing temperature (℃)	Size (bp)
1	Glyma.16G213700	GACGATGAAGAAGAAGAGAGAGAAG	GGTTTGTAGTCTGATGCAGAGC	59	158
2	Glyma.16G213800	CTTCAGAGGGGAAGACACGC	GCACAGTAATAGCAATCCTGG	59	167
3	Glyma.16G213900	TGCGGATCTGCCTGTTGGACTA	GAAGAATGCTTTGGAGGTGTTG	59	245
4	Glyma.16G214000	TTCCACCAAACTTAAAGTATCTC	TAAGGACACCAATCCCAGTAGAC	59	252
5	Glyma.16G214100	GGAACAAGTATACCAGAGTGG	ACGCTTGGAGATCAAAGATAT	59	247
6	Glyma.16G214200	AAATAACACCTGCACTCTCCAA	CGAACCTTTTCTGATGCTTAGTC	59	231
7	Glyma.16G214300	AGTCGTGGATGACATGGAGGGT	ATTCCCATACCACTGCCAAACG	59	157
8	Glyma.16G214500	CATCAAGAGCAAGAATACAGAG	CCTCATAGCTAATTTGACCATC	59	181
9	Glyma.16G214529	CCAAACTTATGTTATTTCCATGC	GGAAGGGAATTTATTACGAAACC	59	195
10	Glyma.16G214557	CAAATTGTTTACCATCGAAC	GAAAGTTCCCTCAAATTTGC	59	193
11	Glyma.16G214585	GCTGCGACAACACATTCCCTTG	GGATGGTTACAAGTTCATCTAAAC	59	268
12	Glyma.16G214613	GAGTTCGAGAGGAGCGACCG	GGGGAGACGATGTTGAGGTTG	59	180
13	Glyma.16G214641	CTTGATTGGGCTCAACTTTCTC	CAATCCTGAAATCACTTTGGG	59	256
14	Glyma.16G214669	GCGCAAGAGATTATGGTTACC	CTACTGTTTCTTCTTTGTAAGATATG	59	119
15	Glyma.16G214700	CCGTCAAGATTTTACTGGCTAT	TACGAAGACGAGTTGAGGATTT	59	142
16	Glyma.16G214800	ATACCCATCAAGAGCAAGAATACAG	ATCTGCAGTTGCAATCATCTCCT	59	155
17	Glyma.16G214900	ATGTGTTCCTCAGCTTCATACGG	AAGTCCAGGTGTTACTTCGGTTTC	59	140
18	Glyma.16G215000	TTCGTAATAAATTCCCTCCCAAAC	CCCTAGCCACTTCTTCAAACCA	59	225
19	Glyma.16G215100	CAAAGATAAGATGGAGAAGCTGC	CCGGATAATCCGCAACATGTA	59	176
20	Glyma.16G215300	AAGGGTATAAATGGACAGTGGT	GCATTTCAACAGTACCATAGCAG	59	132
21	Glyma.16G215400	CGTGCTTATTTACATGCTGTG	GATTCTTCTCGCACGTTTTC	59	218
22	Actin-3	GTGCACAATTGATGGACCAG	GCACCACCGGAGAGAAAATA	59	122

## Sheet: Supplementary Table 7
Supplementary Table 7. Analysis of Williams 82 mutation sites
Number of mutants	Gene	Mutation_ID	Location	Mutation (Ref->Alt)	Amino acid replacement	Mutation type	Mutate line	Phenotype	GmRmd1
3700	Glyma.16G213700	NJAU1515_03454	Gm16:37379353	G->A / Homozygous	262/1126: G->R	Non-synonymous	NJAU1515	Resistant	Wild typea
3800	Glyma.16G213800	NJAU0100_07634	Gm16:37383979	A->T / Heterozygous	677/1098: K->Stop	Stop gain	NJAU0100	Resistant	No mutationb
3900	Glyma.16G213900	NJAU0228_04919	Gm16:37390583	T->A / Homozygous	874/1097: C->Stop	Stop gain	NJAU0228	Resistant	Wild type
4000	Glyma.16G214000	NJAU1933_06020	Gm16:37396761	G->T / Homozygous	268/581: G->Stop	Stop gain	NJAU1933	Susceptible	No mutation
4100	Glyma.16G214100	NJAU1740_07153	Gm16:37408668	G->A / Homozygous	21/1103: G->E	Non-synonymous	NJAU1740	Resistant	Wild type
4200	Glyma.16G214200	NJAU0107_04740	Gm16:37415150	G->A / Homozygous	138/641: R->Q	Non-synonymous	NJAU0107	Susceptible	No mutation
4200-1	Glyma.16G214200	NJAU1925_07349	Gm16:37413629	C->T / Homozygous	580/641: W->Stop	Stop gain	NJAU1925	Susceptible	Wild type
rmd1-1	Glyma.16G214300	NJAU0049_06122	Gm16:37426726	A->T / Homozygous	48/641: K->Stop	Stop gain	NJAU0049	Susceptible	-
rmd1-2	Glyma.16G214300	NJAU0955_03204	Gm16:37426630	T->A / Homozygous	80/641: S->T	Non-synonymous	NJAU0955	Susceptible	-
rmd1-3	Glyma.16G214300	NJAU0053_04072	Gm16:37426200	G->A / Homozygous	accept site	Splice site mutation	NJAU0053	Susceptible	-
4500	Glyma.16G214500	NJAU1714_06423	Gm16:37433817	G->A / Homozygous	26/264: G->S	Non-synonymous	NJAU1714	Resistant	Wild type
4585	Glyma.16G214585	NJAU1257_06403	Gm16:37442723	G->A / Homozygous	34/312: A->T	Non-synonymous	NJAU1257	Resistant	Wild type
4613	Glyma.16G214613	NJAU0823_01167	Gm16:37445900	C->T / Homozygous	32/104: D->N	Non-synonymous	NJAU0823	Resistant	Wild type
4641	Glyma.16G214641	NJAU0210_06993	Gm16:37447122	T->G / Heterozygous	65/115: T->P	Non-synonymous	NJAU0210	Resistant	Wild type
4669	Glyma.16G214669	NJAU0817_01458	Gm16:37451681	C->T / Homozygous	290/1094: Q->Stop	Stop gain	NJAU0817	Resistant	Wild type
4800	Glyma.16G214800	NJAU0310_04402	Gm16:37466392	C->T / Homozygous	254/305: Q->Stop	Stop gain	NJAU0310	Susceptible	No mutation
4900	Glyma.16G214900	NJAU0204_11945	Gm16:37472570	C->T / Homozygous	180/923: A->V	Non-synonymous	NJAU0204	Resistant	Wild type
5000	Glyma.16G215000	NJAU0826_08212	Gm16:37489254	G->A / Homozygous	529/1105: S->N	Non-synonymous	NJAU0826	Susceptible	No mutation
5000-1	Glyma.16G215000	NJAU0108_11336	Gm16:37488590	C->T / Homozygous	722/1105: E->K	Non-synonymous	NJAU0108	Susceptible	Wild type
5100	Glyma.16G215100	NJAU1882_08245	Gm16:37494960	A->T / Homozygous	21/353: T->S	Non-synonymous	NJAU1882	Susceptible	No mutation
5300	Glyma.16G215300	NJAU0398_04323	Gm16:37503724	G->T / Homozygous	256/414: E->D	Non-synonymous	NJAU0398	Susceptible	No mutation
5400	Glyma.16G215400	NJAU0930_03436	Gm16:37507035	A->T / Homozygous	128/393: K->Stop	Stop gain	NJAU0930	Resistant	No mutation
a From the Williams 82 EMS mutation library website (http://isoybean.org/), it was found that the GmRmd1 sequence is the same as the Williams 82 (Wile type) sequence.
b Through Sanger sequencing, it was found that GmRmd1 has no mutation (Reference genome: Wm82.a4.v1 version).
